# Supplementary material
Source: ML conference proceedings conference paper supplement (https://openreview.net/forum?id=7ERQPyR2eb)
Supplement: supplementary_material [file attachment]

Dear reviewer, this folder contains 5 demo videos:

1. `1.Audio_driven_demos.mp4` : This video contains audio-driven results of 10 unseen identities and 6 audio clips for you to experience the overall performance of our Real3D-Portrait. All results are generated by Real3D-Portrait.
2. `2.Compare_video_driven_methods.mp4` : This video provides a qualitative comparison between our Real3D-Portrait against three state-of-the-art one-shot video-driven baselines.
3. `3.Compare_audio_driven_methods.mp4` : This video provides a qualitative comparison between our Real3D-Portrait against three audio-driven baselines.
4. `4.Macron_debug.mp4` : This video illustrates how the final videos of Real3D-Portrait are generated given the source image and input audio.
5. `5.LargePose.mp4` : This video demonstrates that our method could produce natural torso movement at a large driving pose.

You can also view all demo videos and the corresponding explanations on our [demo page](https://real3dportrait.github.io), the URL is [https://real3dportrait.github.io/](https://real3dportrait.github.io). We plan to release our code in the future.
